# Supplementary material for: Oxygen consumption rate of Caenorhabditis elegans as a high-throughput endpoint of toxicity testing using the Seahorse XFe96 Extracellular Flux Analyzer
Source: PubMed Central journal article supplement (PMC7060326; doi:10.1038/s41598-020-61054-7), 2020-03-06
Supplement: 41598_2020_61054_MOESM1_ESM.pdf [file 41598_2020_61054_MOESM1_ESM.pdf]

**Oxygen consumption rate of *Caenorhabditis elegans* as a high-throughput endpoint of toxicity testing using the Seahorse XF<sup>96</sup> Extracellular Flux Analyzer**

G. Du Preez<sup>1,2,\*</sup>, H. Fourie<sup>1</sup>, M. Daneel<sup>2</sup>, H. Miller<sup>3</sup>, S. Höss<sup>4,5</sup>, C. Ricci<sup>6,7</sup>, G. Engelbrecht<sup>1</sup>, M. Zouhar<sup>1,8</sup> & V. Wepener<sup>1</sup>

<sup>1</sup>Unit for Environmental Sciences and Management, North-West University, Private Bag X6001, Potchefstroom, 2520, South Africa

<sup>2</sup>Agricultural Research Council – Institute for Tropical and Subtropical Crops, Private Bag X11208, Nelspruit, 1200, South Africa

<sup>3</sup>Human Metabolomics, Faculty of Natural Sciences, North-West University, Potchefstroom, 2520, South Africa

<sup>4</sup>EcoSSA, Giselastrasse 6, 82319 Starnberg, Germany

<sup>5</sup>University of Bielefeld, Department of Animal Ecology, Konsequenz 45, 33615 Bielefeld, Germany

<sup>6</sup>Centre of Excellence for Nutrition (CEN), North-West University, Potchefstroom, South Africa

<sup>7</sup>Pediatric Epidemiology, Department of Pediatrics, University Medicine Leipzig, Leipzig, Germany

<sup>8</sup>Czech University of Life Sciences, Faculty of Agrobiological Sciences, Food and Natural Resources, Department of Plant Protection, Kamycka 129, 165 21 Prague, Czech Republic

\*Corresponding author: gerhard.dupreez@nwu.ac.za

## Segmented model

The segmented model states that for any value of  $x$  less than  $x_0$  the expected value of  $Y$  is a quadratic function, while for values of  $x$  greater than  $x_0$  the mean of  $Y$  is the constant  $c$ .

$$E[Y|x] = \begin{cases} \alpha + \beta x + \gamma x^2 & \text{if } x < x_0 \\ c & \text{if } x \geq x_0 \end{cases}$$

Continuity and smoothness conditions were imposed to the two segments of the model. Firstly, the continuity condition was obtained so that the quadratic and the plateau section meet at  $x_0$ . Secondly, the first derivative with respect to  $x$  was set to 0 at  $x_0$ .

Continuity condition

$$E[Y|x_0] = \alpha + \beta x_0 + \gamma x_0^2$$

Smoothness condition

$$\frac{\delta E[Y|x_0]}{\delta x} = \beta x_0 + 2\gamma x_0 \equiv 0$$

Solving the equation for  $x_0$  and substitute into the expression for  $c$ , the two conditions are jointly satisfied when:

$$x_0 = -\beta / 2\gamma$$

$$c = \alpha - \beta^2 / 4\gamma$$

Please see SAS (2013) for additional information.
